# Supplementary material for: The potential contribution of miRNA-200-3p to the fatty acid metabolism by regulating AjEHHADH during aestivation in sea cucumber
Source: PeerJ. 2018 Oct 2;6:e5703. doi: 10.7717/peerj.5703 (PMC6173160; doi:10.7717/peerj.5703)
Supplement: Supplemental Information 5 — Raw data of RNA transcript levels of miRNA-200-3p in the intestine of NA and DA groups respectively. [file peerj-06-5703-s005.xlsx]

## Sheet: Sheet1
Well	Sample Name	Target Name	Cт	CT平均	Well	Sample Name	Target Name	Cт	CT平均	200-5.8	差平均	差-差平均	相反数	2的幂	幂平均
A1	Sample 1	200	24.2296	24.3114	A4	Sample 1	5,8	9.31503	9.17631	14.9964	14.8701	0.126318	-0.126318	0.916167	1.00274
E1	Sample 1	200	24.3933		E4	Sample 1	5,8	9.03759						0.974354
B1	Sample 1	200	23.9677	23.9397	B4	Sample 1	5,8	9.03212	9.00148	14.9076		0.0374823	-0.0374823	1.12227
F1	Sample 1	200	23.9116		F4	Sample 1	5,8	8.97084						0.99819
C1	Sample 1	200	23.8984	23.8348	C4	Sample 1	5,8	9.13113	9.10319	14.7037		-0.166415	0.166415	2.04029
G1	Sample 1	200	23.7712		G4	Sample 1	5,8	9.07525						3.04966
D1	Sample 1	200	23.6216	23.5894	D4	Sample 1	5,8	8.71666	8.67522	14.8727		0.00261402	-0.00261402	3.07089
H1	Sample 1	200	23.5571		H4	Sample 1	5,8	8.63379						1.97678
A2	Sample 2	200	21.3329	21.4404	A5	Sample 2	5,8	7.59908	7.31362	13.8413		-1.02877	1.02877	0.76689	2.5344
E2	Sample 2	200	21.5479		E5	Sample 2	5,8	7.02815
B2	Sample 2	200	22.0127	22.1545	B5	Sample 2	5,8	8.89303	8.92627	13.2614		-1.60865	1.60865	1.65267
F2	Sample 2	200	22.2962		F5	Sample 2	5,8	8.95951
C2	Sample 2	200	22.142	22.2061	C5	Sample 2	5,8	8.95466	8.88917	13.2514		-1.61866	1.61866	1.56822
G2	Sample 2	200	22.2702		G5	Sample 2	5,8	8.82368
D2	Sample 2	200	23.1156	23.0856	D5	Sample 2	5,8	9.19872	9.06477	13.8869		-0.983154	0.983154	1.46381
H2	Sample 2	200	23.0557		H5	Sample 2	5,8	8.93082
A3	Sample 3	200	24.1729	24.1282	A6	Sample 3	5,8	8.87516	8.76661	15.253		0.382909	-0.382909		1.3629
E3	Sample 3	200	24.0834		E6	Sample 3	5,8	8.65806
B3	Sample 3	200	23.1994	23.1722	B6	Sample 3	5,8	9.02689	9.00987	14.1453		-0.724801	0.724801
F3	Sample 3	200	23.1449		F6	Sample 3	5,8	8.99286
C3	Sample 3	200	22.7747	23.0738	C6	Sample 3	5,8	8.85289	8.92265	14.2209		-0.649131	0.649131
G3	Sample 3	200	23.373		G6	Sample 3	5,8	8.9924
D3	Sample 3	200	23.3287	23.4486	D6	Sample 3	5,8	9.12826	9.25241	14.3204		-0.549729	0.549729
H3	Sample 3	200	23.5685		H6	Sample 3	5,8	9.37655
