# Supplementary material for: The potential contribution of miRNA-200-3p to the fatty acid metabolism by regulating AjEHHADH during aestivation in sea cucumber
Source: PeerJ. 2018 Oct 2;6:e5703. doi: 10.7717/peerj.5703 (PMC6173160; doi:10.7717/peerj.5703)
Supplement: Supplemental Information 7 — Original fluorescence values of Luc and R-Luc in the WT and MT. [file peerj-06-5703-s007.xlsx]

## Sheet: Sheet1
	BPE 3'UTR-WT+NC	BPE 3'UTR-WT+mir200	BPE 3'UTR-WT+NC	BPE 3'UTR-WT+mir200															23.1082	H3706+mir
	H4230+NC	H4230+mir200	H4231+NC	H4231+mir200															40.1961
Luc	16236000	11779000	9124600	10762000															17.3075		10.8055
	8248100	9360700	8579800	9231800															36.3293		29.2353
	9884500	3804000	8144200	12826000															61.8645	H3706+NC
	6972900	2736100	12306000	14754000															69.3423
	7304700	3304700	10248000	13920000															60.7289		4.67973
	15868000	8421500	15036000	17673000																	63.9786
R-Luc	268480	234400	274010	205390
	114970	162270	258290	216510
	171200	73992	216270	286430
	127050	56601	322150	287860															5556600	H3706+mir
	105510	74543	263240	259450															6621900
	252350	126080	394280	419880															5954300
																			6956700
Luc/R-Luc	60.4738	50.2517	33.3002	52.3979															11852000	H3706+NC
	71.7413	57.686	33.2177	42.6391															7496600
	57.7366	51.411	37.6576	44.7788															10248000
	54.8831	48.3401	38.1996	51.2541															9586300
	69.2323	44.3328	38.9303	53.652
	62.8809	66.7949	38.1353	42.0906
mean	62.8247	53.1361	36.5734	47.8021
s.d.	6.55822	7.98823	2.59956	5.20914
C.V.	0.104389	0.150335	0.0710778	0.108973															240460	H3706+mir
t-test		0.044543	3.69159e-06	0.00134846															164740
Ratio	1	0.845784	0.582151	0.760881															344030
relative value	BPE 3'UTR-WT+NC	BPE 3'UTR-WT+mir200	BPE 3'UTR-WT+NC	BPE 3'UTR-WT+mir200															191490
	0.96258	0.799872	0.910503	1.43268															191580	H3706+NC
	1.14193	0.918206	0.908246	1.16585															108110
	0.919011	0.818324	1.02964	1.22435															168750
	0.873592	0.769445	1.04446	1.4014															389440
	1.10199	0.705659	1.06444	1.46696
	1.0009	1.0632	1.04271	1.15085
mean	1	0.845784	1	1.30702
s.d.	0.104389	0.127151	0.0710778	0.14243
s.e.	0.04262	0.05191	0.02902	0.05815
C.V.	0.104389	0.150335	0.0710778	0.108973
t-test		0.044543	1	0.00166649
	mean		S.E.
WT UTR	1	0.845784	0.04262	0.05191
MT UTR	1	1.30702	0.02902	0.05815
			0.845784
